# Supplementary material
Source: publisher site journal article supplement (https://www.spandidos-publications.com/4980/downloadSupplementary)
Supplement: Supplementary file 1 [file downloadSupplementary]

## Sheet: Top_Significant
Table SVIII. Top mutation significance genes across various ethnicities.
African-American	Hispanic	TCGA-African-American	TCGA-Hispanic
SETD8	SETD8	GATA3	TP53
PRSS1	MTHFR	TP53	PIK3CA
TMIE	PRSS1	PIK3CA	GATA3
PABPC1	KIAA2018	CDH1	MAP3K1
OR8D4	CDC27	PTEN	TYW3
OR6P1	ZNF384	MAP3K1	KHDC1
EPHB6	MEF2A	MAP2K4	CEACAM8
BMP2K	F5	MUC4	TCP10L2
MEF2A	NUDT15	RUNX1	GPS2
TPP1	EIF1AX	FBXW7	SNAP29
ALDH6A1	GPRC6A	RPL37A	WBSCR28
F5	OR2A12	NPAS4	UBE3C
ROM1	ACSF2	RBBP9	CDH1
CDKL4	ATXN1	RAB42	SHISA9
KIAA1012	CLCN7	GPS2	EIF2B2
MAGEF1	ICAM5	HIST1H2AJ	KPNA7
FAM131C	NDUFA7	RFX5	44810
NOX4	CMTM5	RBP2	UPP1
SERPINI2	PPCDC	AKT1	TREM1
C5orf25	CXXC4	OR4D10	KPNA3
KRT76	DCAKD	RASGRF1	GSTO2
MAGED2	SPANXE	BRCA1	DNAJB5
CTU2	GAA	C16orf87	BSX
HMHA1	CHIC1	AFTPH	QARS
ZNF717	C4orf51	FGF6	NFKBID
PAPSS2	EMP3	LYSMD3	SEC23B
OR2A5	C6orf221	SLC27A4	NAA15
SIRPB1	LCE2B	CRYBA1	IGDCC3
GOLGA2	TM2D1	FAHD2A	LPP
MED15	FXYD1	FMNL3	DCDC1
EFHC1	SPINK8	RHPN1	P2RY13
TSC22D1	SERINC4	HIST1H3B	SPATA17
GP6	C20orf202	FAM19A4	RBMS2
G6PD	GSTO2	CRYL1	SNRNP40
ATXN1	SPARC	SEC16B	TIAL1
GPRC6A	C19orf41	CHRNA10	MAGEB1
MTHFR	CDON	KLHL12	C15orf52
NEBL	FAM32A	RARG	TIGD2
ARID1B	CLEC11A	BAG4	FOXA1
RPS21	DLX6	CBX1	C11orf66
HIST4H4	NAP1L3	TFR2	ZBTB26
CMTM5	THAP11	PTCHD3	NMT1
CNPY1	ST8SIA2	MLL3	CASP6
NOP10	ASPN	SLCO1B3	PKM2
DENND4B	OR14I1	SLC25A27	SYT14
UBE2D2	RPL6	VCX	MCHR1
ATG12	JOSD1	OR2T1	SLC9A10
EIF1AX	POU4F2	ILVBL	REPS1
A2ML1	BHLHE22	TSNARE1	LANCL3
C11orf51	SYNC	PLK2	PARP12
RAI1	GLRA3	RNF148	NOP10
LCE2B	NECAB1	NT5DC3	BRD7
C11orf86	GLTP	C10orf91	MT1G
PGPEP1L	HOXA1	ALG14	SRXN1
PFN2	STAP2	HIST1H2BG	WDR44
SYCN		OR7A10	SNURF
NANOS3		CCDC69	BCL9
SLC25A34		TMEM192	H2BFM
OR5I1		TNFRSF10D	ZMPSTE24
PPP1R11		PIWIL1	KRT9
C16orf78		KIF4A	FAM172A
CHIC1		ACTG1	VAMP2
FAM128B		CCDC109A	CFLAR
C11orf88		LCA5L	POLR3A
UTS2D		SPAM1	WSCD2
TNFSF9		DLG1	CAMK2N2
CLEC17A		ARID1A	CHAC2
TIPRL		NAALADL2	C17orf72
OR6C3		LRCH3	SAP25
RBM24		FANK1	NIPAL4
TCF15		ZFYVE16	PTEN
HBB		PQBP1	ITIH5L
DAZL		MSX1	MDGA1
RPL14		OR4X2	ZNF185
ZBTB42		SCN5A	CD99
PEX3		PNMAL1	TFAP2A
OR5K4		CHRD	VPS39
BHLHE22		VAMP5	URB2
RBMS3		ITGA6	ELFN2
LZIC		TUFT1	FAM25A
SIRT4		KLHL28	AMELX
GKAP1		ATF4	PWWP2A
IFNA8		FAM90A1	PPP1R9A
OR5AC2		CA11	MORC1
FAM173A		GPR133	HOOK1
SFXN5		PCGF6	SLC5A7
GPX1		BCOR	TMEM14A
C14orf50		PSG8	MRPS17
		IAPP	ATP6V1G2
		MAGEA11	C7orf29
		KLF7	COX7B2
		DEFB132	TUBB3
		DHRS9	KRTAP5-5
		HIST1H4K	TBC1D16
		LRAT	C1orf204
		REC8	GNL3L
		RNF8	KRT24
		SPANXN2	LBH
		SPRR2B	VPS53
		BNIP3L	CARNS1
		BTBD1	C1orf68
		CCNK	CHCHD2
		ACVR2A	RGPD3
		WNK3	PTBP1
		DLGAP1	ZNF732
		GJA10	SLIT2
		NUP54	TCF7L1
		PVALB	RBP2
		OR11G2	CTR9
		PRB3	NPNT
		KRT222	UBE2D1
		ESX1	SR140
		CDKL2	PNPLA7
		NRIP1	PCP2
		TGFB3	UBL5
		EFCAB3	SERP2
		HNRNPH3	LYZL4
		PTGES3	UBE2V2
		TMEM144	C5orf60
		ARL6IP5	TCEB2
		FAM164A	DENND2C
		CRABP1	UBE2D4
		DGAT2	C6orf201
		PPP1R14A	SRP14
		KCNJ15	UQCR10
		PNCK	IL25
		GAP43	GLYATL3
		RAD21	INPP5A
		TAS2R19	CT47B1
		CALR3	IL15
		YPEL2	MRPS24
		NDUFS5	COX6A2
		VAMP1	PMCH
		TCL1B	CCDC101
		SAV1	TMSB15A
		HIST1H2BM	OR5M8
		COPG2	SLC25A6
		NAPA	NALCN
		EDAR	GRM1
		ZBTB11	MAL
		MRPL45	TXN2
		C1orf9	C3orf45
		SQSTM1	C2CD4D
		ACTRT1	OSBPL8
		APEX2	LIN7C
		P2RY13	CNGB3
		RAP2A	C4orf47
		LCE2A	PLCXD1
		SFRS13B	MRPS18A
		LASP1	LCN10
		SYDE1	TRAPPC9
		TAS2R31	DPH3
		SNX12	UTS2
		SPPL3	LY6G6D
		PPYR1	LIX1L
		SH2D1A	DHRSX
		GBE1	C19orf10
		DCUN1D4	TMEM126B
		PRM1	PIRT
		PRPF38B	OGDHL
		PMP2	ANKRD37
		CHEK2	MTPN
		MAFF	COX7B
		KHDC1L	CTXN3
		KIAA1147	RPL12
		MDP1	SPAG11A
		IFNA2	MMP9
		BTF3	SCGB3A1
		PRDX6	CRYAA
		ALDH9A1	CTF1
		RPAP2	IL22
		CDKN1A	FBXO48
		LCMT2	IPO8
		GTF2F2	HIST1H3G
		RPL22	HMGN3
		EMR2	CLIC1
		TAB3	S100A4
		TBX20	TTBK2
		TMEM220	C10orf11
		PROCR	RALA
		RIN3	RAB27B
		ASTL	FAM186A
		NAA10	SPCS1
		PDE1C	DOC2A
		PRKAA1	INS-IGF2
		CCDC91	PAEP
		UBE2G1	LOXHD1
		FAM158A	LYZL2
		EDDM3A	EBP
		RNF185	SAA1
		CCDC105	IFNA6
		POLE3	C11orf17
		MXD3	PTTG1
		BLK	IFNA10
		HOMER2	RPS5
		HPD	BANF1
		C8G	PRSS1
		SSX1	BID
		LRRC45	MYL6B
		FAM69A	IQCF1
		SYP	APOC2
		HOXC6	GDF2
		HIST1H4D	CARD16
		HIST1H2AK	C3orf57
		TMEM49	CBFB
		WAS	PABPC4L
		IGFALS	KLRC1
		CSF3	FAM159A
		RBMS1	CXCL9
		EP300	GPRIN2
		GIMAP8	DLG3
		CFP	TRPM8
		KCTD8	IQCK
		PIK3R1	EVI2B
		LSR	ARF1
		C12orf45	ACP6
		B3GNT1	SEPX1
		DRAM1	C1orf95
		PGLYRP3	ZMYND19
		SDC1	ELOF1
		SULT1C3	SCN7A
		IFIT2	CELA2A
		PLEKHF1	MPZ
		SLC6A14	DECR2
			TNP2
			CTRC
			RSPH9
			CTSG
			SLC12A6
			NOC2L
			FAM101A
			TRIM77
			GRPEL2
			C19orf40
			EIF4E1B
			SNF8
			SVOP
			DHX29
			SERTAD2
			GNRH2
			SPSB1
			PTP4A2
			C7orf44
			NDUFV2
			SH2D1B
			CDRT15
			DOHH
			PRDX2
			DNAH14
			AQP2
			NNMT
			BIK
			C22orf23
			ZBTB8B
			KCTD5
			TXNRD3IT1
			TMEM85
			LY6D
			UROS
			SH3BGRL2
			PPIL1
			RABL2B
			MRPL16
			CYTH2
			REEP3
			C17orf78
			BTG3
			SLC7A6OS
			IL9R
			APOC4
			PRSS21
			IGLL5
			GNMT
			GGTLC1
			ZNF576
			TMEM169
			ARL6IP6
			UCK1
			TMBIM6
			C22orf43
			C13orf28
			CRISP3
			RPA2
			SNAI3
			SCN2B
			TMEM45B
			IGFBP4
			SH2D1A
			YKT6
			NECAP1
			ENDOG
			LTC4S
			PATL2
			TBC1D21
			PPP1R3B
			C2orf81
			VCX
			HIRIP3
			MSMB
			AGPAT2
			C1QTNF1
			MAL2
			BLOC1S1
			FGF1
			C7orf53
			POTEC
			LMCD1
			HEATR5B
			NOB1
			TMIE
			CIAO1
			CIB1
			SFRS1
			QSER1
			ART1
			MCART6
			CYBASC3
			TMEM35
			PLSCR2
			VAMP5
			YIPF2
			CHAD
			ZFAND2A
			WRB
			ATP6V1D
			SSX7
			OR9G1
			PSAT1
			PPP2R3B
			NAPA
			RHOC
			PRDX6
			TSPAN7
			CCDC75
			HIST1H1B
			EPS15
			C9orf30
			PRR21
			CNFN
			C5orf15
			ADCY9
			OR5AR1
			ST8SIA5
			CST5
			HADH
			SULT1B1
			C3orf26
			PRSS27
			SFXN4
			GSX2
			LGALS12
			APOA1BP
			C22orf25
			DEFB116
			SLFN13
			GPR32
			FAM92B
			RASSF4
			ASAM
			PGPEP1L
			NKX6-2
			OR51I2
			LENG1
			TMEM150C
			GPR35
			EFCAB2
			OR1K1
			RNF125
			DNAJB7
			GMFB
			C14orf68
			ADAL
			MED27
			TOMM34
			UBE2W
			UQCC
			TNFRSF6B
			SPDEF
			KCNIP4
			TCEAL3
			ZNF805
			DCUN1D1
			C16orf90
			PTRF
			BAI2
			NRAS
			RNF215
			KRTAP9-3
			KIAA0913
			C14orf182
			FAM20B
			GALM
			WDR82
			GUCA1C
			SUN5
			PALM3
			ISOC1
			WDR61
			CXorf30
			KIF22
			TMEM223
			ELOVL3
			AGAP7
			CA14
			ETV2
			AUH
			HRASLS2
			GPR3
			CALU
			DUSP19
			CCDC154
			KLF7
			USF1
			KLK12
			SCAMP3
			PEX3
			CDC37
			FAM8A1
			QTRT1
			POU4F2
			OR10A5
			BMP2
			SPINT4
			ZBED2
			NXPH1
			ZBED5
			DAGLB
			DNAJC12
			HOXA7
			OSCAR
			IZUMO1
			GUCY2C
			CMBL
			KHDRBS2
			EFCAB5
			NNAT
			OR56A3
			RARRES3
			RAPSN
			TAAR9
			HOXA6
			STRA13
			CTSL1
			PDK2
			ARPM1
			RGS4
			SSTR4
			ARMC7
			ATPAF1
			IL10RB
			DNAJC18
			TSGA14
			PROZ
			CHADL
			CACNG8
			SH2D4B
			FOXI1
			ADAP1
			DBNDD2
			TRIM54
			TOR3A
			IGF1
			IQCD
			TPPP3
			GRPR
			CUTA
			S100A8
			C17orf46
			ZBTB8OS
			DACT2
			ANXA9
			ASPDH
			OPN3
			CKM
			NUDT1
			AP4M1
			HIST1H3E
			RFXANK
			TEAD3
			KLK1
			APOBEC1
			GPR137C
			MS4A1
			C19orf46
			FAM71E1
			LPGAT1
			UROD
			UBA5
			FBXO32
			NGFR
			TMEM178
			BDH2
			UBR2
			TMEM9B
			CDH26
			OR7D2
			ATP6AP2
			PQLC3
			PSMC3
			RGS5
			TDGF1
			DLK2
			C19orf39
			B3GNTL1
			LASS6
			ADSS
			CHAT
			RAD9A
			ANKH
			CHRNA10
			GCH1
			WWTR1
			ESRRA
			PRR7
			CTAGE9
			ACTL6B
			GRB7
			TNFRSF10A
			WNT1
			JOSD2
			MACROD2
			SERPINF1
			HSPB6
			MED14
			RAB39B
			ZNF665
			ELFN1
			FAM134C
			LCMT1
			OPN4
			MMP13
			C9orf150
			HBP1
			RPS6
			AP4S1
			BPHL
			KLF11
			SPOCK3
TCGA, The Cancer Genome Atlas.
